# Supplementary material for: Desulfovibrio is not always associated with adverse health effects in the Guangdong Gut Microbiome Project
Source: PeerJ. 2021 Aug 18;9:e12033. doi: 10.7717/peerj.12033 (PMC8380029; doi:10.7717/peerj.12033)
Supplement: Supplemental Information 6 [file peerj-09-12033-s006.xlsx]

## Sheet: Sheet1
Table S2: 16S sequences of six type strains of DSV and two type strains of Desulfobacter.
>Desulfovibrio piger NR_041778
AGAGTTTGATCCTGGCTCAGATTGAACGCTGGCGGCGTGCTTAACACATGCAAGTCGTACGCGAAAGGGACTTCGGTCCCGAGTAAAGTGGCGCACGGGTGAGTAACACGTGGATAATCTGCCTCTATGATGGGGATAACAGTTGGAAACGACTGCTAATACCGAATACGCTCATGATGAACTTTGTGAGGAAAGGTGGCCTCTGCTTGCAAGCTATCGCATAGAGATGAGTCCGCGTCCCATTAGCTAGTTGGTGGGGTAACGGCCTACCAAGGCAACGATGGGTAGCCGATCTGAGAGGATGATCGGCCACACTGGAACTGAAACACGGTCCAGACTCCTACGGGAGGCAGCAGTGGGGAATATTGCGCAATGGGCGAAAGCCTGACGCAGCGACGC…
>Desulfovibrio fairfieldensis U42221
ATTGAACGCTGGCGGCGTGCTTAACACATGCAAGTCGAACGCGAAAGAGACTTCGGTCTCGAGTAGAGTGGCGCACGGGTGAGTAACGCGTGGATAATCTGCCCTCATGACCGGGATAACAGTTGGAAACGGCTGCTAATACCGGATACGCTCTGAATGAACTTTTAGGGGAAAGACGGCCTCTGCTTGCAAGCTGTCGTATGAGGATGAGTCCGCGTCCCATTAGCTAGTTGGCGGGGTAACGGCCCACCAAGGCAACGATGGGTAGCCGATCTGAGAGGATGATCGGCCACACTGGAACTGAAACACGGTCCAGACTCCTACGGGAGGCAGCAGTGGGGAATATTGCGCAATGGGCGAAAGCCTGACGCAGCGACGCCGCGTGAGGGATGAAGGTTT…
>Desulfovibrio desulfuricans M34113
TGAACTGGAGAGTNTGATTCTGGCTCAGATTGAACGCTGGCGGCGTGCTTAACACATGCAAGTCGAACGCGAAAGGGACTTCGGTCCTGAGTAAAGTGGCGCACGGGTGAGTAACGCGTGGATAATCTGCCCTTATGATCGGGATAACAGTTGGAAACGGCTGCTAATACCGGATACGCTCAAAATGAACTTTTTGAGGAAAGATGGCCTCTGCTTGCATGCTATCACGTAAGGATGAGTCCGCGTCCCATTAGCTTGTTGGCGGGGTAACGGCCCACCAAGGCATCGATGGGTAGCCGATTTGAGAGGATGATCGGCCACACTGGAACTGAAACACGGTCCAGACTCCTACGGGAGGCAGCAGTGGGGAATATTGCGCAATGGGCGAAAGCCTGACGC…
>Desulfovibrio legallii FJ225426
TCAGATTGAACGCTGGCGGCGTGCTTAACACATGCAAGTCGAACGCGAACGGGGCTTCGGCCCCAAGTAGAGTGGCGCACGGGTGAGTAACGCGTGGACAATCTGCCCTTATGACTGGAATAACAGTTGGAAACGGCTGCTAATACCGGATACGCTCAGGAAGAACTTTTTGAGGAAAGGCGGCCTCTGCTTGCAAGCTGTCGCATAAGGATGAGTCCGCGTCCCATTAGCTAGTTGGCGGGGTAACGGCCCACCAAGGCAACGATGGGTAGCCGATTTGAGAGGATGATCGGCCACACTGGGACTGAAACACGGCCCAGACTCCTACGGGAGGCAGCAGTGGGGAATATTGCGCAATGGGCGAAAGCCTGACGCAGCGACGCCGCGTGAGGGATGAAG…
>Desulfovibrio vulgaris AF418179
AGAGTTTGATCCTGGCTCAGATTGAACGCTGGCGGCGTGCTTAACACATGCAAGTCGCGCGTGAAAGGACTTCGGTCCGAGTAAAGCGGCGCACGGGTGAGTAACGCGTGGATGATCTACCCATGAGTTGGGAATAACGGCTGGAAACGGTCGCTAATACCGAATACGCTCCGATTTCAACTTCGGGGGAAAGGTGGCCTCTGCTTGCAAGCTACTGCTCATGGATGAGTCCGCGTCCCATTAGCTAGTTGGTGGGGTAACGGCCCACCAAGGCGACGATGGGTAGCCGGTCTGAGAGGATGACCGGCCACACTGGGACTGGAACACGGCCCAGACTCCTACGGGAGGCAGCAGTGGGGAATATTGCGCAATGGGCGAAAGCCTGACGCAGCGACGCCG…
>Desulfovibrio intestinalis Y12254
ATTGAACGCTGGCGGCGTGCTTAACACATGCAAGTCGAACGTGAAAGGGGCTTCGGCCCTAAGTAAAGTGGCGCACGGGTGAGTAACACGTGGATAATCTGCCCTTATGATCGGGATAACAGTCGGAAACGGCTGCTAATACCGGATACGCTCAAAATGAACTTTTTGAGGAAAGGTGACCTCTGCTTGCAAGTTACTGCATGAGGATGAGTCCGCGGCCCATTAGCTAGTTGGTAGGGTAACGGCCTACCAAGGCAACGATGGGTAGCCGATTTGAGAGGATGATCGGCCACACTGGGACTGAAACACGGCCCAGACTCCTACGGGAGGCAGCAGTGGGGAATATTGCGCAATGGGCGAAAGCCTGACGCAGCGACGCCGCGTGAGGGATGAAGGTTT…
>Desulfobacter postgatei AF418180
AGAGTTTGATCCTGGCTCAGAATGAACGCTGGCGGCGTGCTTAACACATGCAAGTCGAACGAGAAAGGGATTGCTTGCAATCCCGAGTAGAGTGGCGCACGGGTGAGTAACACGTAGATAATCTGCCTTCAAGCCTGGGATAACTATTCGAAAGGGTAGCTAATACCGGATAAAGTCGATTTACACAAGTAGATTGATGAAAGATTGCCTCTTCTTGAAAGCAATTGTTTGGAGATGAGTTTGCGTACCATTAGCTTGTTGGTGGGGTAAAGGCCTACCAAGGCAACGATGGTTAGCTGGTCTGAGAGGATGATCAGCCACACTGGAACTGGAACACGGTCCAGACTCCTACGGGAGGCAGCAGTGAGGAATTTTGCGCAATGGGGGCAACCCTGACGC…
>Desulfobacter vibrioformis U12254
TGGCTCAGAATGAACGCTGGCGGCGTGCTTAACACATGCAAGTCGAACGAGAAAGGGATTGCTTGCAATCCTGAGTAGAGTGGCGCACGGGTGAGTAACACGTAGATAATCTGTCTCCAAGCCTGGGATAACTATTCGAAAGGGTAGCTAATACCGGATAAAGTTGATTCACATAAGTGGATTAATGAAAGATTGCCTCTTCNTGAAAGCAATTGTTTGGGGGTGAGTTTGCGTACCATTAGCTTGTTGGTGGGGTAAAGGCCTACCAAGGCAACGATGGTTAGCTGGTCTGAGAGGATGATCAGTCACACTGGAACTGGAACACGGTCCAGACTCCTACGGGAGGCAGCAGTGAGGAATTTTGCGCAATGGGGGCAACCCTGACGCAGCAACGCCGCG…
