# Supplementary material for: Desulfovibrio is not always associated with adverse health effects in the Guangdong Gut Microbiome Project
Source: PeerJ. 2021 Aug 18;9:e12033. doi: 10.7717/peerj.12033 (PMC8380029; doi:10.7717/peerj.12033)
Supplement: Supplemental Information 7 [file peerj-09-12033-s007.xlsx]

## Sheet: Sheet1
Table S3: Sequence similarity of V4 region sequences.
	Seq5554	Seq15128	Seq14263	Seq295	Seq1686	Seq7611	Seq10119	Seq12972
Desulfovibrio piger ATCC29098	1	0.996	0.992	0.98	0.972	0.976	0.9602	0.912
Desulfovibrio fairfieldensis ATCC70045	0.98	0.984	0.988	1	0.984	0.988	0.976	0.928
Desulfovibrio desulfuricans ATCC27774	0.972	0.976	0.98	0.984	1	0.988	0.976	0.928
Desulfovibrio legallii strain H1	0.9644	0.9684	0.9723	0.9763	0.9763	0.9842	0.9605	0.913
Desulfovibrio vulgaris DSM644	0.9283	0.9283	0.9243	0.9206	0.9203	0.9246	0.932	0.88
Desulfovibrio intestinalis strain KMS2	0.96	0.964	0.968	0.976	0.976	0.972	1	0.928
