# Supplementary material for: Desulfovibrio is not always associated with adverse health effects in the Guangdong Gut Microbiome Project
Source: PeerJ. 2021 Aug 18;9:e12033. doi: 10.7717/peerj.12033 (PMC8380029; doi:10.7717/peerj.12033)
Supplement: Supplemental Information 8 [file peerj-09-12033-s008.xlsx]

## Sheet: Sheet1
Table S4: The predominant genera (defined as the genera with mean relative abundance higher than 1%) associated with DSV tested by co-occurrence network analysis.
Genera	FDR_P	r
Oscillospira	3.9399e-199	0.364098
Phascolarctobacterium	2.51193e-98	0.259101
Prevotella	4.48243e-97	0.257471
Coprococcus	3.92112e-59	0.201037
Dialister	2.87893e-39	0.163117
Ruminococcus	1.04994e-27	0.136004
Akkermansia	8.8035e-21	0.116711
Roseburia	4.35199e-18	0.108271
Faecalibacterium	3.37436e-12	0.08703
Bacteroides	0.0011024	0.0408551
Klebsiella	0.0262156	-0.0278398
Escherichia	9.33481e-14	-0.0931155
SMB53	1.31429e-15	-0.0998727
Clostridium	8.21839e-16	-0.100589
Sediminibacterium	7.78335e-27	-0.133735
Ralstonia	2.64654e-35	-0.154377
Streptococcus	8.58437e-38	-0.159923
