# Supplementary material for: Desulfovibrio is not always associated with adverse health effects in the Guangdong Gut Microbiome Project
Source: PeerJ. 2021 Aug 18;9:e12033. doi: 10.7717/peerj.12033 (PMC8380029; doi:10.7717/peerj.12033)
Supplement: Supplemental Information 9 [file peerj-09-12033-s009.xlsx]

## Sheet: Sheet1
Table S5: Spearman correlation coefficients summarizing correlations between host parameters and DSV at the genus and sub-OTU levels.
	BMI	waist	DBP	SBP	HDL	LDL	TG	TCHO	UA	sleep_time
DSV (genus)	-0.0442	-0.0412	-0.00102	0.00433	0.0113	0.00995	-0.0382	0.0054	-0.0437	0.04
Seq14263	-0.0491	-0.0464	0.0222	0.0398	0.0354	0.0229	-0.035	0.042	-0.035	0.0447
Seq12972	-0.00414	-0.00182	0.0016	0.0349	-0.0148	0.0028	0.00869	-0.00406	-0.0274	0.0172
Seq5554	-0.0245	-0.0225	0.00319	0.0198	0.029	0.0213	-0.0213	0.0304	-0.0051	-0.00946
Seq295	0.00571	0.00872	-0.0263	-0.0263	-0.024	0.000298	0.00803	-0.0113	0.0261	-0.00669
Seq7611	-0.00142	-0.00544	-0.04	-0.04	-0.054	-0.0314	0.00597	-0.0434	0.0177	-0.0205
Seq15128	-0.0166	-0.0186	-0.000437	-0.0183	0.0379	0.00775	-0.0216	0.0121	-0.0247	0.0428
Seq1686	-0.00396	-0.0156	-0.0255	-0.0304	0.0103	-0.0168	-0.0149	-0.0311	-0.0227	0.0122
Seq10119	-0.0264	-0.0131	-0.00956	-0.0348	-0.0172	-0.00397	0.0185	-0.0104	0.0155	-0.00933
