# Supplementary material for: Desulfovibrio is not always associated with adverse health effects in the Guangdong Gut Microbiome Project
Source: PeerJ. 2021 Aug 18;9:e12033. doi: 10.7717/peerj.12033 (PMC8380029; doi:10.7717/peerj.12033)
Supplement: Supplemental Information 10 [file peerj-09-12033-s010.xlsx]

## Sheet: Sheet1
Table S6: FDR adjusted p values of Spearman's rank correlation between host parameters and DSV at the genus and sub-OTU levels.
	BMI	waist	DBP	SBP	HDL	LDL	TG	TCHO	UA	sleep_time
DSV (genus)	0.0072	0.00972	0.95625	0.826463	0.548852	0.604688	0.01452	0.791053	0.0072	0.0102214
Seq14263	0.0044235	0.00696	0.179769	0.0102214	0.0246	0.174	0.0246	0.00862	0.0246	0.0072
Seq12972	0.826463	0.937059	0.940814	0.0246	0.385714	0.882857	0.640435	0.826463	0.100333	0.3114
Seq5554	0.138176	0.175263	0.86747	0.237273	0.0744231	0.196071	0.196071	0.05688	0.801818	0.613881
Seq295	0.791053	0.640435	0.111	0.111	0.146571	0.981	0.673714	0.548852	0.111484	0.7425
Seq7611	0.941379	0.791053	0.0102214	0.0102214	0.001638	0.0527727	0.78411	0.0072	0.301875	0.213488
Seq15128	0.323654	0.277826	0.981	0.281489	0.0147937	0.683239	0.196071	0.515593	0.138	0.0072
Seq1686	0.826463	0.366667	0.121219	0.05688	0.59	0.322941	0.385714	0.0536087	0.175263	0.513621
Seq10119	0.111	0.473684	0.613881	0.0246	0.3114	0.826463	0.277826	0.59	0.366667	0.613881
