# Supplementary material for: Desulfovibrio is not always associated with adverse health effects in the Guangdong Gut Microbiome Project
Source: PeerJ. 2021 Aug 18;9:e12033. doi: 10.7717/peerj.12033 (PMC8380029; doi:10.7717/peerj.12033)
Supplement: Supplemental Information 11 [file peerj-09-12033-s011.xlsx]

## Sheet: Sheet1
Table S7: FDR adjusted p values of Spearman's rank correlation between blood pressure and DSV at the genus and sub-OTU levels for hypertensive individuals.
	DBP	SBP
DSV (genus)	0.44145	0.528
Seq295	0.971	0.528
Seq14263	0.528	0.811125
Seq15128	0.528	0.1611
Seq1686	0.971	0.750857
Seq7611	0.528	0.528
Seq5554	0.7872	0.528
Seq12972	0.1611	0.528
Seq10119	0.656308	0.3702
