# Supplementary material for: Desulfovibrio is not always associated with adverse health effects in the Guangdong Gut Microbiome Project
Source: PeerJ. 2021 Aug 18;9:e12033. doi: 10.7717/peerj.12033 (PMC8380029; doi:10.7717/peerj.12033)
Supplement: Supplemental Information 12 [file peerj-09-12033-s012.xlsx]

## Sheet: sheet1
Table S8: Sequences of eight predominant features of DSV, and their best matches.
>Seq295 Desulfovibrio
TACGGAGGGTGCAAGCGTTAATCGGAATTACTGGGCGTAAAGCGCACGTAGGCTGTTGTGTAAGTCAGGGGTGAAATCCCACGGCTCAACCGTGGAACTGCCCTTGATACTGCATGACTTGAATCCGGGAGAGGGTGGCGGAATTCCAGGTGTAGGAGTGAAATCCGTAGATATCTGGAGGAACATCAGTGGCGAAGGCGGCCACCTGGACCGGTATTGACGCTGAGGTGCGAAAGCGTGGGGAGCAAAC
>Desulfovibrio sp. DSM 105247 (MN537481)
TACGGAGGGTGCAAGCGTTAATCGGAATTACTGGGCGTAAAGCGCACGTAGGCTGTTGTGTAAGTCAGGGGTGAAATCCCACGGCTCAACCGTGGAACTGCCCTTGATACTGCATGACTTGAATCCGGGAGAGGGTGGCGGAATTCCAGGTGTAGGAGTGAAATCCGTAGATATCTGGAGGAACATCAGTGGCGAAGGCGGCCACCTGGACCGGTATTGACGCTGAGGTGCGAAAGCGTGGGGAGCAAAC
>Desulfovibrio sp. Marseille-P6017 (LT996086)
TGGAGAGTTTGATTCTGGCTCAGATTGAACGCTGGCGGCGTGCTTAACACATGCAAGTCGAACGCGAAAGTGGCTTCGGTCACGAGTAGAGTGGCGCACGGGTGAGTAACGCGTGGATAATCTGCCCTCATAACCGGGATAACAGTTGGAAACGGCTGCTAATACCGGATACGCTCTGAATGAACTTTTAGGGGAAAGACGGCCTCTGCTTGCAAGCTGTCGTATGAGGATGAGTCCGCGTCCCATTAGCTGGTTGGCGGGGTAACGGCCCACCAAGGCAACGATGGGTAGCCGATCTGAGAGGATGATCGGCCACACTGGAACTGAAACACGGTCCAGACTCCTACGGGAGGCAGCAGTGGGGAATATTGCGCAATGGGCGAAAGCCTGACGCAGCGA…
>Desulfovibrio fairfieldensis ATCC70045 (U42221)
TACGGAGGGTGCAAGCGTTAATCGGAATTACTGGGCGTAAAGCGCACGTAGGCTGTTGTGTAAGTCAGGGGTGAAATCCCACGGCTCAACCGTGGAACTGCCCTTGATACTGCATGACTTGAATCCGGGAGAGGGTGGCGGAATTCCAGGTGTAGGAGTGAAATCCGTAGATATCTGGAGGAACATCAGTGGCGAAGGCGGCCACCTGGACCGGTATTGACGCTGAGGTGCGAAAGCGTGGGGAGCAAACAGG
>Seq14263 Desulfovibrio
TACGGAGGGTGCAAGCGTTAATCGGAATCACTGGGCGTAAAGCGCACGTAGGCTGTTATGTAAGTCAGGGGTGAAATCCCACGGCTCAACCGTGGAACTGCCCTTGATACTGCACGACTTGAATCCGGGAGAGGGTGGCGGAATTCCAGGTGTAGGAGTGAAATCCGTAGATATCTGGAGGAACATCAGTGGCGAAGGCGGCCACCTGGACCGGTATTGACGCTGAGGTGCGAAAGCGTGGGGAGCAAAC
>Desulfovibrio piger strain DSM 106036(MN537505)
TACGGAGGGTGCAAGCGTTAATCGGAATCACTGGGCGTAAAGCGCACGTAGGCTGTTATGTAAGTCAGGGGTGAAATCCCACGGCTCAACCGTGGAACTGCCCTTGATACTGCACGACTTGAATCCGGGAGAGGGTGGCGGAATTCCAGGTGTAGGAGTGAAATCCGTAGATATCTGGAGGAACATCAGTGGCGAAGGCGGCCACCTGGACCGGTATTGACGCTGAGGTGCGAAAGCGTGGGGAGCAAAC
>Desulfovibrio piger strain dsv1(MH588319)
TACGGAGGGTGCAAGCGTTAATCGGAATCACTGGGCGTAAAGCGCACGTAGGCTGTTATGTAAGTCAGGGGTGAAAGCCCACGGCTCAACCGTGGAACTGCCCTTGATACTGCACGACTCGAATCCGGGAGAGGGTGGCGGAATTCCAGGTGTAGGAGTGAAATCCGTAGATATCTGGAGGAACATCAGTGGCGAAGGCGGCCACCTGGACCGGTATTGACGCTGAGGTGCGAAAGCGTGGGGAGCAAAC
>Desulfovibrio piger strain Vib-7(KT881309)
TACGGAGGGTGCAAGCGTTAATCGGAATCACTGGGCGTAAAGCGCACGTAGGCTGTTATGTAAGTCAGGGGTGAAAGCCCACGGCTCAACCGTGGAACTGCCCTTGATACTGCACGACTCGAATCCGGGAGAGGGTGGCGGAATTCCAGGTGTAGGAGTGAAATCCGTAGATATCTGGAGGAACATCAGTGGCGAAGGCGGCCACCTGGACCGGTATTGACGCTGAGGTGCGAAAGCGTGGGGAGCAAAC
>Seq15128 Desulfovibrio
TACGGAGGGTGCAAGCGTTAATCGGAATCACTGGGCGTAAAGCGCACGTAGGCTGTTATGTAAGTCAGGGGTGAAAGCCCACGGCTCAACCGTGGAACTGCCCTTGATACTGCACGACTTGAATCCGGGAGAGGGTGGCGGAATTCCAGGTGTAGGAGTGAAATCCGTAGATATCTGGAGGAACATCAGTGGCGAAGGCGGCCACCTGGACCGGTATTGACGCTGAGGTGCGAAAGCGTGGGGAGCAAAC
>Seq1686 Desulfovibrio
TACGGAGGGTGCAAGCGTTAATCGGAATTACTGGGCGTAAAGCGCACGTAGGCTGTAGTGTAAGTCAGGGGTGAAATCCCACGGCTCAACCGTGGAACTGCCTTTGATACTGCACAACTTGAATCCGGGAGAGGGTGGCGGAATTCCAGGTGTAGGAGTGAAATCCGTAGATATCTGGAGGAACATCAGTGGCGAAGGCGGCCACCTGGACCGGTATTGACGCTGAGGTGCGAAAGCGTGGGGAGCAAAC
>Desulfovibrio desulfuricans strain UIS0184(MT178061)
AAGCCTGACGCAGCGACGCCGCGTGAGGGATGAAGGTTTTCGGATCGTAAACCTCTGTCAGAAGGGAAGAAACTACGTTGTGCTAATCAGCAGCGTACTGACGGTACCTTCAAAGGAAGCACCGGCTAACTCCGTGCCAGCAGCCGCGGTAATACGGAGGGTGCAAGCGTTAATCGGAATTACTGGGCGTAAAGCGCACGTAGGCTGTAGTGTAAGTCAGGGGTGAAATCCCACGGCTCAACCGTGGAACTGCCTTTGATACTGCACAACTTGAATCCGGGAGAGGGTGGCGGAATTCCAGGTGTAGGAGTGAAATCCGTAGATATCTGGAGGAACATCAGTGGCGAAGGCGGCCACCTGGACCGGTATTGACGCTGAGGTGCGAAAGCGTGGGGAGCA…
>Desulfovibrio desulfuricans strain 101620294(MN306006)
GCTGGCGGCGTGCTTAACACATGCAAGTCGAACGCGAAAGGGGCTTCGGCCCTGAGTAAAGTGGCGCACG GGTGAGTAACGCGTGGATAATCTGCCCTTATGATCGGGATAACAGTTGGAAACGGCTGCTAATACCGGAT ACGCTCAAGATGAACTTTTTGAGGAAAGATGGCCTCTGCTTGCATGCTATCGCGTAAGGATGAGTCCGCG TCCCATTAGCTTGTTGGCGGGGTAACGGCCCACCAAGGCAACGATGGGTAGCCGATTTGAGAGGATGATC GGCCACACTGGAACTGAAACACGGTCCAGACTCCTACGGGAGGCAGCAGTGGGGAATATTGCGCAATGGG CGAAAGCCTGACGCAGCGACGCCGCGTGAGGGATGAAGGTTTTC…
>Desulfovibrio desulfuricans ATCC27774(M34113)
TACGGAGGGTGCAAGCGTTAATCGGAATTACTGGGCGTAAAGCGCACGTAGGCTGTAGTGTAAGTCAGGGGTGAAATCCCACGGCTCAACCGTGGAACTGCCTTTGATACTGCACAACTTGAATCCGGGAGAGGGTGGCGGAATTCCAGGTGTAGGAGTGAAATCCGTAGATATCTGGAGGAACATCAGTGGCGAAGGCGGCCACCTGGACCGGTATTGACGCTGAGGTGCGAAAGCGTGGGGAGCAAACAGG
>Seq7611 Desulfovibrio
TACGGAGGGTGCAAGCGTTAATCGGAATTACTGGGCGTAAAGCGCACGTAGGCTGTTGTGTAAGTCAGGGGTGAAATCCCACGGCTCAACCGTGGAACTGCCTTTGATACTGCACGACTTGAATCCGGGAGAGGGTGGCGGAATTCCAGGTGTAGGAGTGAAATCCGTAGATATCTGGAGGAACACCAGTGGCGAAGGCGGCCACCTGGACCGGTATTGACGCTGAGGTGCGAAAGCGTGGGGAGCAAAC
>Desulfovibrio legallii strain H1 (FJ225426)
TACGGAGGGTGCAAGCGTTAATCGGAATTACTGGGCGTAAAGCGCACGTAGGCTGTTGTGTAAGTCAGGGGTGAAATCCCACGGCTCAACCGTGGAACTGCCTTTGATACTGCACGACTTGAATCCGGGAGAGGGTGGCGGAATTCCAGGTGTAGGAGTGAAATCCGTACGATATCTGGAGGAACACTCAGTGGTGAATGGCGGCCACCTGGACCGGTATTGACGCTGAGGTGCGAAAGCGTGGGGAGCAAACAGG
>Desulfovibrio desulfuricans strain E7(KJ459866)
TGCAGTTCGAACGCGATAGGGGCTTTGGCCCTGAGAAGTGGCGCACGGGTGATCACGCGTGGAAATCTGC CCTTAGGATCGGGAACCAGTTGGAAACGGCTGCTAATACCGGATACGCTCAAAATGAACTTTTTGAGGAA AGATGGCCTCTGCTTGCATGCTATCGCATAGGGATGAGTCCGCGTCCCATTAGCTTGTTGGCGGGGTAAC GGCCCACCAAGGCAACGATGGGTAGCCGATTTGAGAGGTGATCGGCCACACTGGAACTGAAACACGGTCC AGACTACTACGGGAGGCAGCAGTGGGGAATATTGCGCAATGGGCGAAAGCCTGACGCAGCGACGCCGCGT GAGGGATGAAGGTTTTCGGATCGTAAACCTCTGTCAGAAGGGAA…
>Desulfovibrio desulfuricans strain E6(KJ459865)
TGCAGTCGAACGCGAAAGGGGCTTCGGCCCTGAGTAAAGTGGCGCACGGGTGAGTAACGCGTGGATAATC TGCCCTTATGATCGGGATAACAGTTGGAAACGGCTGCTAATACCGGATACGCTCAAAATGAACTTTTTGA GGAAAGATGGCCTCTGCTTGCATGCTATCGCATAGGGATGAGTCCGCGTCCCATTAGCTTGTTGGCGGGG TAACGGCCCACCAAGGCAACGATGGGTAGCCGATTTGAGAGGATGATCGGCCACACTGGAACTGAAACAC GGTCCAGACTACTACGGGAGGCAGCAGTGGGGAATATTGCGCAATGGGCGAAAGCCTGACGCAGCGACGC CGCGTGAGGGATGAAGGTTTTCGGATCGTAAACCTCTGTCAGAA…
>Seq5554 Desulfovibrio
TACGGAGGGTGCAAGCGTTAATCGGAATCACTGGGCGTAAAGCGCACGTAGGCTGTTATGTAAGTCAGGGGTGAAAGCCCACGGCTCAACCGTGGAACTGCCCTTGATACTGCACGACTCGAATCCGGGAGAGGGTGGCGGAATTCCAGGTGTAGGAGTGAAATCCGTAGATATCTGGAGGAACATCAGTGGCGAAGGCGGCCACCTGGACCGGTATTGACGCTGAGGTGCGAAAGCGTGGGGAGCAAAC
>Desulfovibrio piger ATCC29098 (NR_041778)
TACGGAGGGTGCAAGCGTTAATCGGAATCACTGGGCGTAAAGCGCACGTAGGCTGTTATGTAAGTCAGGGGTGAAAGCCCACGGCTCAACCGTGGAACTGCCCTTGATACTGCACGACTCGAATCCGGGAGAGGGTGGCGGAATTCCAGGTGTAGGAGTGAAATCCGTAGATATCTGGAGGAACATCAGTGGCGAAGGCGGCCACCTGGACCGGTATTGACGCTGAGGTGCGAAAGCGTGGGGAGCAAACAGG
>Seq12972 Desulfovibrio D168
TACGGAGGGTGCAAGCGTTAATCGGAATTACTGGGCGTAAAGCGCGCGTAGGTTGTTTTGTAAGTCAGAGGTGTAATCCCACGGCTTAACCGTGGAACTGCCTTTGATACTGCATAACTTGGATCCGGGAGAGGACAGCGGAATTCCAGGTGTAGGAGTGAAATCCGTAGATATCTGGAAGAACATCAGTGGCGAAGGCGGCTGTCTGGACCGGTATTGACGCTGAGGCGCGAAAGCGTGGGTAGCAAAC
>Desulfovibrio sp. Marseille-P2429(LT223575)
AGAGTTTGATCCTGGCTCAGATTGAACGCTGGCGGCGTGYTTAACACATGCAAGTCGRACGCGAAAGTGG CTTCGGCCACGAGTAGAGTGGCGCACGGGTGAGTAACGCGTGGATAATCTGCCTCTGCAATCGGAATAAC GACTGGAAACGGTCGCTAATACCGGATACGCTTAAGTTTTACCTCTTAAGGAAAGATGACCTCTATTTAT AAGTTATCGTGCAGAGATGAGTCCGCGTCCCATTAGCTTGTTGGCGGGGTAACGGCCCACCAAGGCGACG ATGGGTAGCCGATTTAAGAGGATGATCGGCCACATTGGAACTGAAACACGGTCCAAACTCCTACGGGAGG CAGCAGTGGGGAATATTGCGCAATGGGCGAAAGCCTGACGCAGC…
>Desulfovibrio sp. oral taxon 040 clone WWP_SS2_P07(GU398181)
ATTGAACGCTGGCGGCGTGCTTAACACATGCAAGTCGAACGCGAAAGTGGCTTCGGCCGCGAGTAGAGTG GCGCACGGGTGAGTAACGCGTGGATAATCTGCCCTCATGACCGGGATAACAGTTGGAAACGGCTGCTAAT ACCGGATACGCTCTGAATGAAGTTTTAGGGGAAAGACGGCCTCTGCTTGCAAGCTGTCGTATGAGGATGA GTCCGCGTCCCATTAGCTTGTTGGCGGGGTAAGTGCCCACCAAGGCAACGATGGGTAGCCGATCTGAGAG GATGATCGGCCACACTGGAACTGAAACACGGTCCAGACTCCTGCGGGAGGCAGCAGTGGGGAATATTGCG CAATGGGCGAAAGCCTGACGCAGCGACGCCGCGTGAGGGATGAA…
>Desulfovibrio sp. G11(FJ815444)
GATTGAACGCTGGCGGCGTGCTTAACACATGCAAGTCGAACGCGAAAGGGACTTCGGTCCTGAGTAAAGT GGCGCACGGGTGAGTAACACGTGGATAATCTGCCCCTATGATCGGGATAACAGTCGGAAACGGCTGCTAA TACCGGATACGCTCAAAATGAACTTTTTGAGGAAAGGTGACCTCTGCTTGCATGTTACCGTATAGGGATG AGTCCGCGTCCCATTAGCTTGTTGGTGGGGTAAAGGCCTACCAAGGCAACGATGGGTAGCCGATTTGAGA GGATGATCGGCCACACTGGGACTGAAACACGGCCCAGACTCCTACGGGAGGCAGCAGTGGGGAATATTGC GCAATGGGCGAAAGCCTGACGCAGCGACGCCGCGTGAGGGATGA…
>Seq10119 Desulfovibrio
TACGGAGGGTGCAAGCGTTAATCGGAATTACTGGGCGTAAAGCGCACGTAGGCTGCTTTGTAAGTCAGGGGTGAAATCCCACGGCTCAACCGTGGAACTGCCTTTGATACTGCTTAGCTTGAATCCGGGAGAGGGTGGCGGAATTCCAGGTGTAGGAGTGAAATCCGTAGATATCTGGAGGAACATCAGTGGCGAAGGCGGCCACCTGGACCGGTATTGACGCTGAGGTGCGAAAGCGTGGGGAGCAAAC
>Desulfovibrio intestinalis strain KMS2 (Y12254)
TACGGAGGGTGCAAGCGTTAATCGGAATTACTGGGCGTAAAGCGCACGTAGGCTGCTTTGTAAGTCAGGGGTGAAATCCCACGGCTCAACCGTGGAACTGCCTTTGATACTGCTTAGCTTGAATCCGGGAGAGGGTGGCGGAATTCCAGGTGTAGGAGTGAAATCCGTAGATATCTGGAGGAACATCAGTGGCGAAGGCGGCCACCTGGACCGGTATTGACGCTGAGGTGCGAAAGCGTGGGGAGCAAACAGG
>Desulfovibrio desulfuricans strain AfyonDD(MG545729)
ATGCAAAGTCGAACGCGAAAGGGACTTCGGTCCTGAGTAAAGTGGCGCACGGGTGAGTAACACGTGGATA ATCTGCCCTTATGATCGGGATAACAGTCGGAAACGGCTGCTAATACCGGATACGCTCAAAATGAACTTTT TGAGGAAAGGTGACCTCTGCTTGCATGTTACCGTATAAGGATGAGTCCGCGTCCCATTAGCTTGTTGGTG GGGTAAAGGCCTACCAAGGCAACGATGGGTAGCCGATTTGAGAGGATGATCGGCCACACTGGGACTGAAA CACGGCCCAGACTCCTACGGGAGGCAGCAGTGGGGAATATTGCGCAATGGGCGAAAGCCTGACGCAGCGA CGCCGCGTGAGGGATGAAGGTTTTCGGATCGTAAACCTCTGTCA…
>Desulfovibrio desulfuricans strain dsv2(MH588320)
CCATTGCGGGGTCTTACCATGCAGTCGAACGCGAAAGGGACTTCGGTCCTGAGTAAAGTGGCGCACGGGT GAGTAACACGTGGATAATCTGCCCCTATGATCGGGATAACAGTCGGAAACGGCTGCTAATACCGGATACG CTCAAGATGAACTTTTTGAGGAAAGGTGACCTCTGCTTGCATGTTACCGTATAGGGATGAGTCCGCGTCC CATTAGCTTGTTGGTGGGGTAAAGGCCTACCAAGGCAACGATGGGTAGCCGATTTGAGAGGATGATCGGC CACACTGGGACTGAAACACGGCCCAGACTCCTACGGGAGGCAGCAGTGGGGAATATTGCGCAATGGGCGA AAGCCTGACGCAGCGACGCCGCGTGAGGGATGAAGGTTTTCGGA…
>Desulfovibrio vulgaris DSM644(AF418179)
TACGGAGGGTGCGAGCGTTAATCGGAATCACTGGGCGTAAAGCGCACGTAGGCTGCTTGGTAAGTCAGGGGTGAAAGCCCGCGGCTCAACCGCGGAATTGCCTTTGATACTGCCGAGCTAGAGTCCGGGAGAGGGTAGTGGAATTCCAGGTGTAGGAGTGAAATCCGTAGAGATCTGGAGGAACATCAGTGGCGAAGGCGACTACCTGGACCGGTACTGACGCTGAGGTGCGAAAGCGTGGGGAGCAAACAGG
